# Supplementary material for: Longitudinal changes of early motor and cognitive symptoms in progressive supranuclear palsy: the OxQUIP study
Source: HighWire-hosted journal article supplement (doi:10.1136/bmjno-2021-000214), 2022-01-01

**SUPPLEMENTAL MATERIAL****Supplemental table 1.** Description of the OxQUIP study

|                   |                                                                                                                                                                       |
|-------------------|-----------------------------------------------------------------------------------------------------------------------------------------------------------------------|
| <b>Overview</b>   | The OxQUIP study is a large prospective cohort study of neurophysiological biomarkers in parkinsonian patients, conducted at the John Radcliffe Hospital, Oxford, UK. |
| <b>Objective</b>  | The aim of OxQUIP is to develop novel methods of objective disease progression measurement.                                                                           |
| <b>Procedures</b> | This is achieved by repeated administration of a battery of tests, according to a structured protocol, at three-monthly intervals.                                    |
| <b>Notes</b>      | The study was approved by the research ethics committee and the Health Research Authority (REC 16/SW/0262).                                                           |

**Supplemental table 2.** Binary logistic regression for the assessment of risk factor for withdrawing the study.

|        |                                       | p. value | Odds Ratio | 95% C.I. |       |
|--------|---------------------------------------|----------|------------|----------|-------|
|        |                                       |          |            | Lower    | Upper |
| Step 1 | Gender                                | 0.225    | 0.144      | 0.006    | 3.305 |
|        | Education                             | 0.890    | 0.956      | 0.509    | 1.795 |
|        | Time (months) since onset of symptoms | 0.242    | 1.045      | 0.971    | 1.125 |
|        | Age at onset of symptoms              | 0.016    | 1.346      | 1.056    | 1.716 |
|        | MoCA - Total Score                    | 0.746    | 0.945      | 0.670    | 1.332 |
| Step 2 | Gender                                | 0.189    | 0.159      | 0.010    | 2.475 |
|        | Time (months) since onset of symptoms | 0.236    | 1.043      | 0.973    | 1.119 |
|        | Age at onset of symptoms              | 0.015    | 1.341      | 1.059    | 1.699 |
|        | MoCA - Total Score                    | 0.649    | 0.933      | 0.694    | 1.256 |
| Step 3 | Sex                                   | 0.135    | 0.129      | 0.009    | 1.896 |
|        | Time (months) since onset of symptoms | 0.211    | 1.046      | 0.975    | 1.122 |
|        | Age at onset of symptoms              | 0.009    | 1.355      | 1.078    | 1.703 |
| Step 4 | Gender                                | 0.162    | 0.174      | 0.015    | 2.017 |
|        | Age at onset of symptoms              | 0.010    | 1.335      | 1.071    | 1.665 |
| Step 5 | Age at onset of symptoms              | 0.013    | 1.310      | 1.058    | 1.622 |

**Supplemental figure 1.** Comparison of demographic characteristics at baseline between participants who completed all the visits and those who withdrew. Adjustment for multiple comparisons was made using Bonferroni correction ( $p < 0.005$ ).

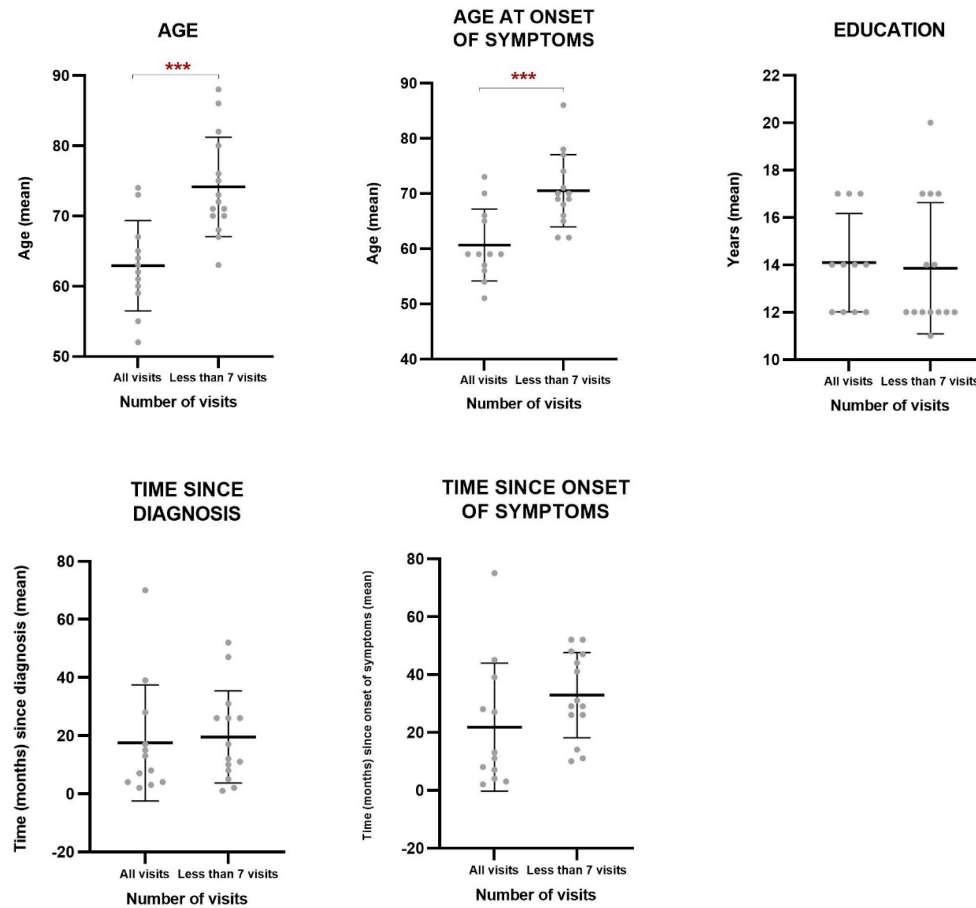

Supplement: bmjno-2021-000214supp001_data_supplement.pdf [file bmjno-2021-000214supp001_data_supplement.pdf]
